# Supplementary material for: Characterization of Homicides in Mexico: Analysis of 2015–2022
Source: MDPI journal article supplement (doi:10.3390/ijerph21050617), 2024-05-13
Supplement: s1 [file s1]

**Table S1:** Number of violent deaths and incidence rate by year and state of occurrence in men.

| State                 | 2015 n(IR)    | 2016 n(IR)    | 2017 n(IR)    | 2018 n(IR)    | 2019 n(IR)    | 2020 n(IR)    | 2021 n(IR)    | 2022 n(IR)    | Mean n(IR)     |
|-----------------------|---------------|---------------|---------------|---------------|---------------|---------------|---------------|---------------|----------------|
| Aguascalientes        | 40 (6.11)     | 44 (6.59)     | 71 (10.48)    | 65 (9.46)     | 87 (12.48)    | 76 (10.76)    | 85 (11.87)    | 71 (9.79)     | 539 (9.69)     |
| Baja California Norte | 699 (41.57)   | 954 (56.05)   | 1816 (104.88) | 2361 (134.14) | 2059 (115.15) | 1923 (105.91) | 1962 (106.48) | 1767 (94.55)  | 13541 (94.84)  |
| Baja California Sur   | 150 (40.91)   | 217 (57.85)   | 619 (161.28)  | 137 (34.92)   | 62 (15.47)    | 49 (11.98)    | 48 (11.51)    | 35 (8.23)     | 1317 (42.76)   |
| Campeche              | 56 (12.36)    | 78 (16.92)    | 68 (14.48)    | 60 (12.55)    | 67 (13.78)    | 57 (11.52)    | 71 (14.12)    | 79 (15.46)    | 536 (13.89)    |
| Coahuila              | 229 (15.29)   | 206 (13.56)   | 215 (13.95)   | 192 (12.29)   | 218 (13.76)   | 193 (12.02)   | 124 (7.62)    | 126 (7.65)    | 1503 (12.01)   |
| Colima                | 190 (53.03)   | 496 (135.96)  | 669 (180.08)  | 550 (145.47)  | 535 (139.13)  | 462 (118.2)   | 434 (109.3)   | 697 (172.89)  | 4033 (131.75)  |
| Chiapas               | 462 (17.76)   | 461 (17.44)   | 521 (19.41)   | 460 (16.89)   | 535 (19.36)   | 427 (15.23)   | 466 (16.39)   | 410 (14.23)   | 3742 (17.08)   |
| Chihuahua             | 1098 (61.14)  | 1378 (76.07)  | 1833 (100.13) | 2034 (109.99) | 2294 (122.87) | 2532 (134.38) | 2192 (115.31) | 1779 (92.81)  | 15140 (101.58) |
| Ciudad de México      | 919 (21.22)   | 1113 (25.72)  | 1167 (26.98)  | 1305 (30.21)  | 1133 (26.26)  | 1189 (27.6)   | 941 (21.89)   | 630 (14.69)   | 8397 (24.32)   |
| Durango               | 193 (21.94)   | 200 (22.48)   | 172 (19.15)   | 125 (13.79)   | 139 (15.2)    | 119 (12.91)   | 127 (13.67)   | 89 (9.5)      | 1164 (16.08)   |
| Guanajuato            | 829 (28.7)    | 1048 (35.84)  | 1984 (67.15)  | 2937 (98.45)  | 3295 (109.44) | 4077 (134.23) | 3304 (107.88) | 3068 (99.38)  | 20542 (85.13)  |
| Guerrero              | 1988 (114.75) | 2100 (120.56) | 2134 (121.94) | 1786 (101.62) | 1559 (88.36)  | 1289 (72.81)  | 1181 (66.5)   | 1119 (62.83)  | 13156 (93.6)   |
| Hidalgo               | 166 (11.85)   | 160 (11.27)   | 236 (16.4)    | 247 (16.96)   | 389 (26.39)   | 318 (21.32)   | 239 (15.85)   | 298 (19.55)   | 2053 (17.44)   |
| Jalisco               | 934 (23.8)    | 1030 (25.93)  | 1239 (30.83)  | 1988 (48.93)  | 2042 (49.74)  | 1770 (42.69)  | 1767 (42.22)  | 1425 (33.74)  | 12195 (37.23)  |
| México                | 2183 (27.17)  | 2263 (27.82)  | 2512 (30.5)   | 2592 (31.11)  | 2648 (31.43)  | 2491 (29.26)  | 2523 (29.34)  | 2609 (30.05)  | 19821 (29.58)  |
| Michoacán             | 734 (32.55)   | 1241 (54.53)  | 1488 (64.85)  | 1662 (71.87)  | 2068 (88.77)  | 1973 (84.09)  | 2231 (94.44)  | 1839 (77.34)  | 13236 (71.05)  |
| Morelos               | 403 (43.09)   | 559 (59.01)   | 558 (58.19)   | 718 (74.01)   | 929 (94.69)   | 892 (89.94)   | 1035 (103.27) | 1046 (103.33) | 6140 (78.19)   |
| Nayarit               | 115 (19.26)   | 119 (19.61)   | 376 (60.98)   | 298 (47.61)   | 157 (24.72)   | 140 (21.73)   | 162 (24.81)   | 153 (23.12)   | 1520 (30.23)   |
| Nuevo León            | 388 (14.91)   | 528 (19.95)   | 566 (21.06)   | 737 (27.03)   | 855 (30.91)   | 809 (28.85)   | 945 (33.26)   | 1234 (42.88)  | 6062 (27.35)   |
| Oaxaca                | 679 (35.19)   | 653 (33.61)   | 830 (42.45)   | 900 (45.76)   | 977 (49.39)   | 733 (36.86)   | 655 (32.77)   | 636 (31.66)   | 6063 (38.46)   |
| Puebla                | 515 (17.05)   | 608 (19.89)   | 892 (28.87)   | 1005 (32.2)   | 1075 (34.1)   | 740 (23.25)   | 651 (20.27)   | 755 (23.3)    | 6241 (24.86)   |
| Querétaro             | 118 (11.59)   | 114 (10.94)   | 177 (16.65)   | 197 (18.18)   | 180 (16.3)    | 198 (17.61)   | 194 (16.96)   | 158 (13.58)   | 1336 (15.22)   |
| Quintana Roo          | 118 (15.34)   | 159 (20.16)   | 389 (48.06)   | 728 (87.74)   | 632 (74.37)   | 545 (62.67)   | 585 (65.81)   | 572 (62.99)   | 3728 (54.64)   |
| San Luis Potosí       | 213 (15.81)   | 291 (21.42)   | 433 (31.63)   | 460 (33.35)   | 439 (31.6)    | 705 (50.39)   | 669 (47.5)    | 661 (46.64)   | 3871 (34.79)   |
| Sinaloa               | 929 (61.94)   | 1026 (67.67)  | 1356 (88.63)  | 978 (63.38)   | 876 (56.3)    | 648 (41.32)   | 449 (28.41)   | 456 (28.64)   | 6718 (54.53)   |
| Sonora                | 471 (32.79)   | 503 (34.6)    | 645 (43.79)   | 796 (53.35)   | 1127 (74.61)  | 1342 (87.79)  | 1603 (103.65) | 1386 (88.62)  | 7873 (64.90)   |
| Tabasco               | 323 (27)      | 374 (30.87)   | 390 (31.82)   | 463 (37.35)   | 587 (46.84)   | 520 (41.06)   | 383 (29.93)   | 285 (22.05)   | 3325 (33.36)   |

|            |             |              |              |              |              |              |               |               |              |
|------------|-------------|--------------|--------------|--------------|--------------|--------------|---------------|---------------|--------------|
| Tamaulipas | 493 (28.47) | 616 (35.25)  | 950 (53.9)   | 865 (48.67)  | 641 (35.78)  | 657 (36.39)  | 513 (28.2)    | 311 (16.97)   | 5046 (35.45) |
| Tlaxcala   | 63 (9.99)   | 74 (11.55)   | 99 (15.26)   | 118 (17.96)  | 158 (23.76)  | 110 (16.35)  | 128 (18.82)   | 134 (19.49)   | 884 (16.64)  |
| Veracruz   | 819 (20.45) | 1085 (26.84) | 1564 (38.43) | 1281 (31.27) | 1252 (30.37) | 995 (24)     | 800 (19.2)    | 639 (15.26)   | 8435 (25.72) |
| Yucatán    | 47 (4.47)   | 54 (5.08)    | 38 (3.53)    | 48 (4.41)    | 38 (3.45)    | 58 (5.21)    | 43 (3.83)     | 37 (3.26)     | 363 (4.15)   |
| Zacatecas  | 275 (34.92) | 455 (57.21)  | 561 (69.99)  | 570 (70.59)  | 559 (68.74)  | 944 (115.29) | 1442 (174.97) | 1172 (141.32) | 5978 (91.62) |

IR= Incidence rate for 100,000 men

**Table S2:** Number of violent deaths and incidence rate by year and state of occurrence in women.

| State                 | 2015 n (IR) | 2016 n (IR) | 2017 n (IR) | 2018 n (IR) | 2019 n (IR) | 2020 n (IR) | 2021 n (IR) | 2022 n (IR) | Mean n (IR)  |
|-----------------------|-------------|-------------|-------------|-------------|-------------|-------------|-------------|-------------|--------------|
| Aguascalientes        | 7 (1.03)    | 4 (0.58)    | 7 (1)       | 8 (1.13)    | 7 (0.97)    | 7 (0.96)    | 11 (1.49)   | 11 (1.47)   | 62 (1.07)    |
| Baja California Norte | 102 (6.08)  | 121 (7.11)  | 193 (11.15) | 252 (14.31) | 209 (11.67) | 222 (12.2)  | 240 (12.99) | 219 (11.68) | 1558 (10.89) |
| Baja California Sur   | 21 (5.95)   | 12 (3.32)   | 67 (18.09)  | 20 (5.28)   | 12 (3.1)    | 5 (1.26)    | 7 (1.73)    | 7 (1.7)     | 151 (5.05)   |
| Campeche              | 8 (1.72)    | 10 (2.12)   | 6 (1.25)    | 12 (2.45)   | 10 (2.01)   | 6 (1.19)    | 13 (2.53)   | 12 (2.3)    | 77 (1.94)    |
| Coahuila              | 58 (3.86)   | 36 (2.36)   | 34 (2.2)    | 22 (1.4)    | 44 (2.76)   | 32 (1.98)   | 19 (1.16)   | 20 (1.21)   | 265 (2.11)   |
| Colima                | 24 (6.6)    | 55 (14.87)  | 69 (18.35)  | 72 (18.84)  | 76 (19.57)  | 83 (21.05)  | 48 (11.99)  | 96 (23.65)  | 523 (16.86)  |
| Chiapas               | 65 (2.4)    | 76 (2.76)   | 63 (2.25)   | 45 (1.58)   | 66 (2.29)   | 66 (2.26)   | 58 (1.95)   | 60 (1.99)   | 499 (2.18)   |
| Chihuahua             | 118 (6.48)  | 150 (8.16)  | 234 (12.59) | 224 (11.92) | 267 (14.07) | 295 (15.39) | 303 (15.65) | 231 (11.83) | 1822 (12.01) |
| Ciudad de México      | 133 (2.81)  | 144 (3.05)  | 139 (2.94)  | 136 (2.88)  | 141 (2.99)  | 137 (2.91)  | 122 (2.59)  | 103 (2.19)  | 1055 (2.79)  |
| Durango               | 8 (0.89)    | 12 (1.32)   | 26 (2.82)   | 19 (2.04)   | 21 (2.24)   | 15 (1.58)   | 10 (1.05)   | 24 (2.49)   | 135 (1.80)   |
| Guanajuato            | 97 (3.19)   | 121 (3.94)  | 210 (6.77)  | 333 (10.63) | 372 (11.76) | 564 (17.68) | 487 (15.13) | 499 (15.38) | 2683 (10.56) |
| Guerrero              | 204 (11.06) | 230 (12.4)  | 192 (10.3)  | 209 (11.16) | 169 (8.99)  | 144 (7.63)  | 141 (7.45)  | 125 (6.58)  | 1414 (9.44)  |
| Hidalgo               | 45 (3)      | 40 (2.63)   | 47 (3.06)   | 44 (2.82)   | 62 (3.93)   | 41 (2.57)   | 42 (2.6)    | 49 (3)      | 370 (2.95)   |
| Jalisco               | 132 (3.27)  | 114 (2.79)  | 124 (3)     | 218 (5.22)  | 233 (5.52)  | 218 (5.11)  | 222 (5.16)  | 174 (4)     | 1435 (4.25)  |
| México                | 386 (4.58)  | 402 (4.72)  | 449 (5.21)  | 423 (4.85)  | 432 (4.9)   | 395 (4.43)  | 409 (4.54)  | 458 (5.04)  | 3354 (4.78)  |
| Michoacán             | 79 (3.31)   | 127 (5.27)  | 138 (5.69)  | 163 (6.67)  | 178 (7.23)  | 235 (9.48)  | 256 (10.26) | 236 (9.4)   | 1412 (7.16)  |
| Morelos               | 44 (4.42)   | 79 (7.84)   | 72 (7.07)   | 80 (7.76)   | 97 (9.31)   | 80 (7.6)    | 96 (9.03)   | 112 (10.44) | 660 (7.93)   |
| Nayarit               | 10 (1.67)   | 21 (3.46)   | 52 (8.43)   | 35 (5.59)   | 19 (2.99)   | 20 (3.1)    | 27 (4.13)   | 13 (1.96)   | 197 (3.91)   |
| Nuevo León            | 50 (1.92)   | 79 (2.98)   | 60 (2.23)   | 85 (3.12)   | 95 (3.43)   | 88 (3.14)   | 97 (3.41)   | 150 (5.2)   | 704 (3.17)   |
| Oaxaca                | 86 (4.12)   | 103 (4.9)   | 116 (5.48)  | 116 (5.45)  | 132 (6.16)  | 106 (4.92)  | 79 (3.65)   | 121 (5.56)  | 859 (5.03)   |
| Puebla                | 83 (2.55)   | 93 (2.83)   | 132 (3.97)  | 120 (3.57)  | 117 (3.45)  | 106 (3.1)   | 99 (2.87)   | 94 (2.7)    | 844 (3.13)   |
| Querétaro             | 19 (1.81)   | 15 (1.4)    | 34 (3.11)   | 28 (2.51)   | 25 (2.2)    | 25 (2.16)   | 26 (2.21)   | 25 (2.09)   | 197 (2.18)   |
| Quintana Roo          | 20 (2.65)   | 28 (3.61)   | 45 (5.65)   | 87 (10.67)  | 69 (8.27)   | 66 (7.73)   | 74 (8.48)   | 59 (6.62)   | 448 (6.71)   |
| San Luis Potosí       | 36 (2.55)   | 31 (2.18)   | 47 (3.28)   | 53 (3.67)   | 47 (3.23)   | 57 (3.89)   | 76 (5.14)   | 58 (3.9)    | 405 (3.48)   |
| Sinaloa               | 50 (3.3)    | 79 (5.15)   | 81 (5.23)   | 41 (2.63)   | 50 (3.17)   | 34 (2.14)   | 29 (1.81)   | 34 (2.11)   | 398 (3.19)   |

|            |            |            |            |            |            |            |             |             |             |
|------------|------------|------------|------------|------------|------------|------------|-------------|-------------|-------------|
| Sonora     | 62 (4.28)  | 52 (3.54)  | 61 (4.1)   | 60 (3.98)  | 106 (6.94) | 87 (5.63)  | 139 (8.88)  | 139 (8.78)  | 706 (5.76)  |
| Tabasco    | 32 (2.6)   | 46 (3.69)  | 43 (3.41)  | 46 (3.6)   | 76 (5.89)  | 55 (4.21)  | 45 (3.41)   | 41 (3.07)   | 384 (3.73)  |
| Tamaulipas | 65 (3.69)  | 122 (6.85) | 132 (7.35) | 111 (6.12) | 104 (5.69) | 71 (3.85)  | 59 (3.17)   | 48 (2.56)   | 712 (4.91)  |
| Tlaxcala   | 11 (1.66)  | 10 (1.48)  | 17 (2.49)  | 18 (2.61)  | 25 (3.58)  | 27 (3.82)  | 28 (3.91)   | 16 (2.21)   | 152 (2.72)  |
| Veracruz   | 103 (2.43) | 131 (3.06) | 196 (4.55) | 134 (3.09) | 159 (3.64) | 132 (3)    | 104 (2.35)  | 104 (2.34)  | 1063 (3.05) |
| Yucatán    | 9 (0.83)   | 9 (0.82)   | 13 (1.18)  | 9 (0.8)    | 4 (0.35)   | 12 (1.05)  | 7 (0.6)     | 6 (0.51)    | 69 (0.76)   |
| Zacatecas  | 21 (2.58)  | 76 (9.25)  | 89 (10.75) | 87 (10.42) | 72 (8.56)  | 100 (11.8) | 156 (18.27) | 151 (17.56) | 752 (11.14) |

IR= Incidence rate for 100,000 women

**Table S3.** Frequencies and percentages of homicides at national and regional level by sex and age group.

| Age group<br>Men   | North Central<br>n (%) | Center<br>n (%) | North<br>n (%) | Northwest<br>n (%) | South<br>n (%) | National<br>n (%) |
|--------------------|------------------------|-----------------|----------------|--------------------|----------------|-------------------|
| 0-4                | 55 (0.16)              | 173 (0.26)      | 82 (0.16)      | 27 (0.16)          | 59 (0.14)      | 396 (0.19)        |
| 5-9                | 57 (0.16)              | 149 (0.22)      | 55 (0.11)      | 21 (0.12)          | 63 (0.16)      | 345 (0.16)        |
| 10-14              | 150 (0.44)             | 414 (0.63)      | 207 (0.42)     | 80 (0.47)          | 204 (0.51)     | 1055 (0.51)       |
| 15-19              | 2371 (6.99)            | 4815 (7.36)     | 3308 (6.72)    | 1386 (8.30)        | 2682 (6.81)    | 14562 (7.12)      |
| 20-24              | 5108 (15.0)            | 9689 (14.8)     | 7081 (14.4)    | 2660 (15.9)        | 5728 (14.5)    | 30266 (14.8)      |
| 25-29              | 5861 (17.3)            | 10811 (16.5)    | 7999 (16.2)    | 2827 (16.9)        | 6109 (15.5)    | 33607 (16.4)      |
| 30-34              | 5227 (15.4)            | 10059 (15.3)    | 7515 (15.2)    | 2430 (14.5)        | 5416 (13.7)    | 30647 (14.9)      |
| 35-39              | 4561 (13.4)            | 8343 (12.7)     | 6732 (13.6)    | 2115 (12.6)        | 4939 (12.5)    | 26690 (13.0)      |
| 40-44              | 3656 (10.7)            | 6840 (10.4)     | 5672 (11.5)    | 1733 (10.3)        | 4282 (10.8)    | 22183 (10.8)      |
| 45-49              | 2660 (7.85)            | 4903 (7.49)     | 4151 (8.44)    | 1266 (7.58)        | 3213 (8.16)    | 16193 (7.91)      |
| 50-54              | 1590 (4.69)            | 3369 (5.15)     | 2638 (5.36)    | 846 (5.06)         | 2403 (6.10)    | 10846 (5.30)      |
| 55-59              | 1026 (3.02)            | 2186 (3.34)     | 1626 (3.30)    | 507 (3.03)         | 1590 (4.04)    | 6935 (3.39)       |
| 60-64              | 629 (1.85)             | 1475 (2.25)     | 1046 (2.12)    | 294 (1.76)         | 1087 (2.76)    | 4531 (2.21)       |
| 65 or above        | 923 (2.72)             | 2188 (3.34)     | 1053 (2.14)    | 505 (3.02)         | 1573 (3.99)    | 6242 (3.05)       |
| Age group<br>women | North Central<br>n (%) | Center<br>N (%) | North<br>n (%) | Northwest<br>n (%) | South<br>n (%) | National<br>n (%) |
| 0-4                | 39 (1.01)              | 118 (1.26)      | 80 (1.38)      | 25 (1.53)          | 49 (1.01)      | 311 (1.22)        |
| 5-9                | 43 (1.12)              | 98 (1.05)       | 47 (0.81)      | 24 (1.46)          | 63 (1.30)      | 275 (1.08)        |
| 10-14              | 77 (2.00)              | 180 (1.93)      | 97 (1.68)      | 40 (2.44)          | 106 (2.20)     | 500 (1.97)        |
| 15-19              | 449 (11.7)             | 847 (9.09)      | 513 (8.89)     | 194 (11.8)         | 461 (9.57)     | 2464 (9.71)       |
| 20-24              | 580 (15.1)             | 1363 (14.6)     | 945 (16.3)     | 266 (16.2)         | 632 (13.1)     | 3786 (14.9)       |
| 25-29              | 627 (16.3)             | 1409 (15.1)     | 898 (15.5)     | 240 (14.6)         | 652 (13.5)     | 3826 (15.0)       |
| 30-34              | 468 (12.1)             | 1239 (13.3)     | 833 (14.4)     | 205 (12.5)         | 571 (11.8)     | 3316 (13.0)       |
| 35-39              | 436 (11.3)             | 1061 (11.3)     | 683 (11.8)     | 174 (10.6)         | 542 (11.2)     | 2896 (11.4)       |
| 40-44              | 323 (8.41)             | 841 (9.02)      | 519 (8.99)     | 139 (8.51)         | 466 (9.68)     | 2288 (9.02)       |

|             |            |            |            |            |            |             |
|-------------|------------|------------|------------|------------|------------|-------------|
| 45-49       | 234 (6.09) | 601 (6.45) | 404 (7.00) | 104 (6.36) | 328 (6.81) | 1671 (6.58) |
| 50-54       | 164 (4.27) | 421 (4.51) | 257 (4.45) | 76 (4.65)  | 276 (5.73) | 1194 (4.70) |
| 55-59       | 110 (2.86) | 344 (3.69) | 155 (2.68) | 52 (3.18)  | 209 (4.34) | 870 (3.42)  |
| 60-64       | 82 (2.13)  | 213 (2.28) | 110 (1.90) | 30 (1.83)  | 127 (2.63) | 562 (2.21)  |
| 65 or above | 205 (5.34) | 580 (6.22) | 226 (3.91) | 64 (3.91)  | 331 (6.87) | 1406 (5.54) |

**Table S4.** Structural and sociodemographic characteristics associated with homicides by region.

| <b>Structural factor (men)</b>             | <b>North Central</b> | <b>Center</b>       | <b>North</b>        | <b>Northwest</b>    | <b>South</b>        |
|--------------------------------------------|----------------------|---------------------|---------------------|---------------------|---------------------|
| Percentage of population living in poverty | 1.006 (1.005-1.007)  | 1.011 (1.01-1.011)  | 1.023 (1.022-1.024) | 1.014 (1.013-1.015) | 1.002 (1.002-1.003) |
| Marginazation index                        | 0.138 (0.107_0.178)  | 0.012 (0.01-0.014)  | 0.002 (0.001-0.002) | 0.028 (0.022-0.036) | 0.171 (0.145_0.201) |
| Education lag                              | 1.033 (1.032-1.034)  | 1.036 (1.035-1.037) | 1.06 (1.05-1.06)    | 1.048 (1.045-1.051) | 0.998 (0.997-1)     |
| <b>Structural factor (women)</b>           | <b>North Central</b> | <b>Center</b>       | <b>North</b>        | <b>Northwest</b>    | <b>South</b>        |
| Percentage of population living in poverty | 1.007 (1.005-1.009)  | 1.012 (1.011-1.014) | 1.021 (1.018-1.023) | 1.018 (1.015-1.022) | 1.003 (1.001-1.004) |
| Marginalization index                      | 0.083 (0.041-0.17)   | 0.013 (0.008-0.021) | 0.004 (0.003-0.007) | 0.041 (0.02-0.088)  | 0.135 (0.087-0.21)  |
| Education lag                              | 1.031 (1.028-1.035)  | 1.03 (1.027-1.033)  | 1.05 (1.04-10.05)   | 1.045 (1.036-1.053) | 1 (0.997-1.003)     |

Bivariate logistic regression models were run, the dependent variable was a dichotomic variable with homicide and other causes as contrasting categories.

OR=odds ratio, CI= Interval confidence
